# Supplementary material for: RGS11-CaMKII complex mediated redox control attenuates chemotherapy-induced cardiac fibrosis
Source: PubMed Central journal article supplement — Redox Biol. 2022 Sep 27;57:102487. doi: 10.1016/j.redox.2022.102487 (PMC9557029; doi:10.1016/j.redox.2022.102487), 2022-09-27
Supplement: mmc1.pdf [file mmc1.pdf]

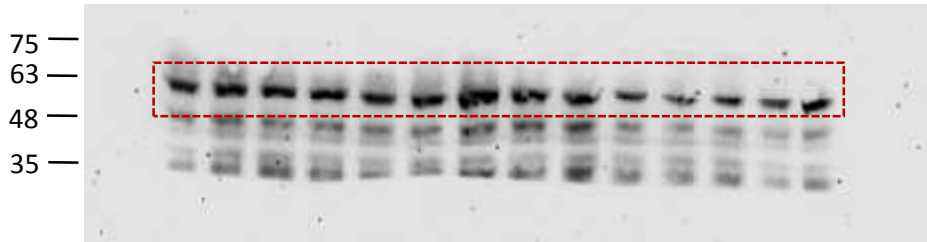

RGS11

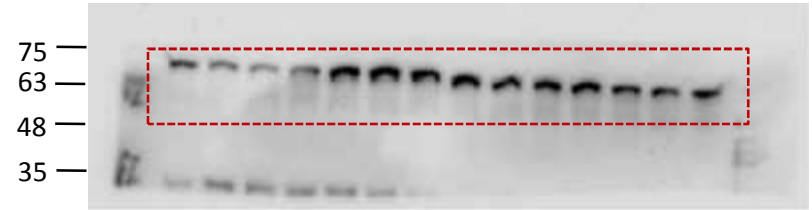

4HNE

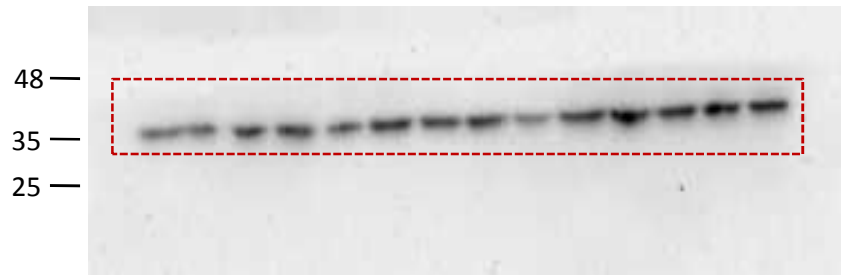

Troponin T

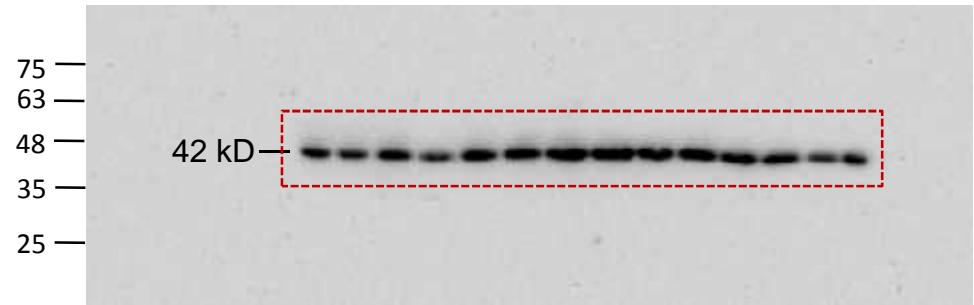

$\alpha$ -SMA

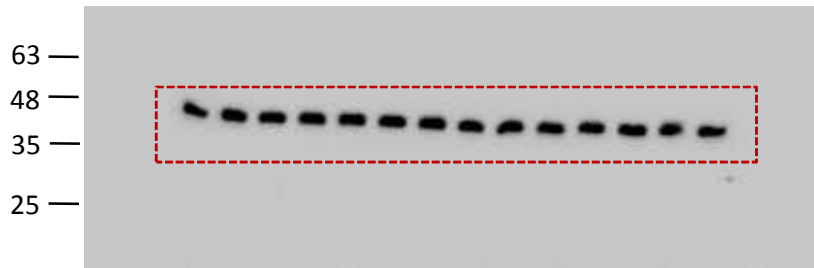

$\beta$ -Actin

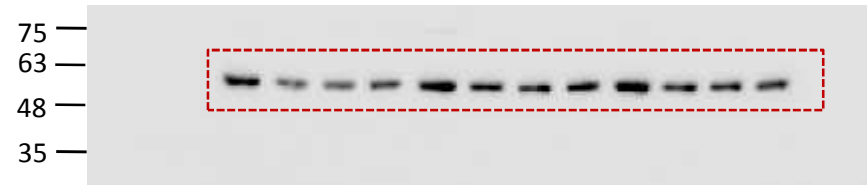

RGS11

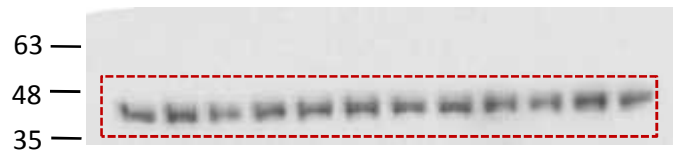

$\beta$ -Actin

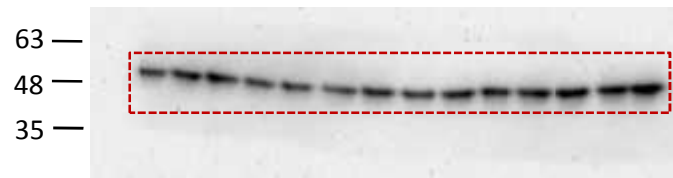

p-CAMKII

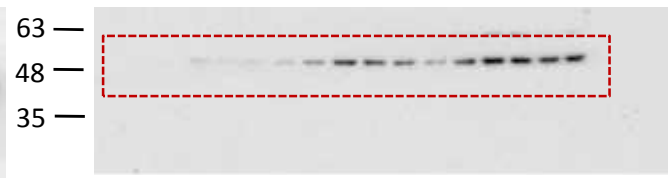

ox-CaMKII

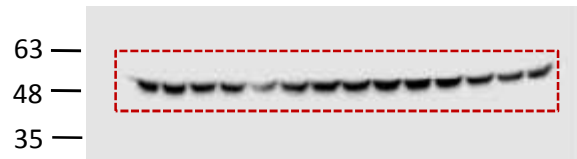

CaMKII

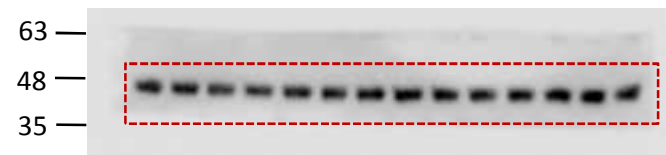

$\beta$ -Actin

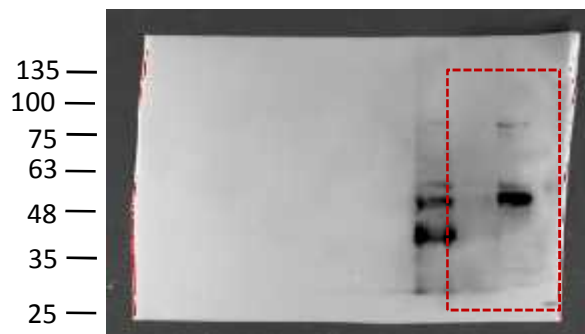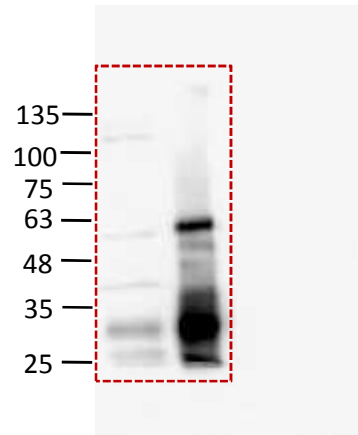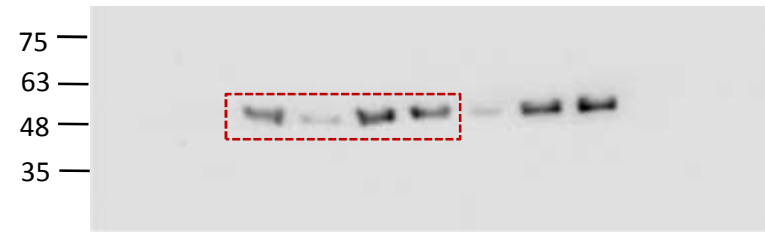

CaMKII

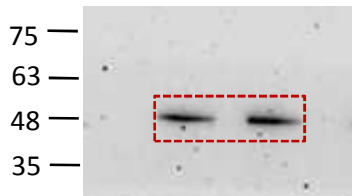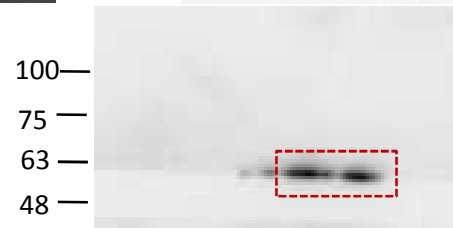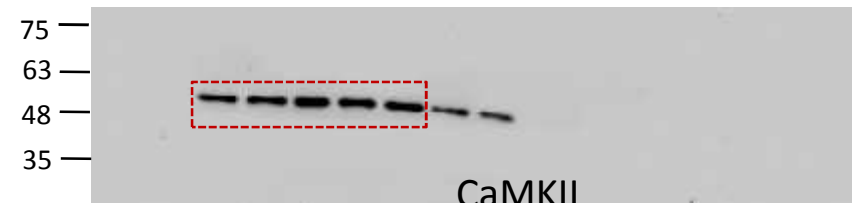

CaMKII

RGS11\_CaMKII IP

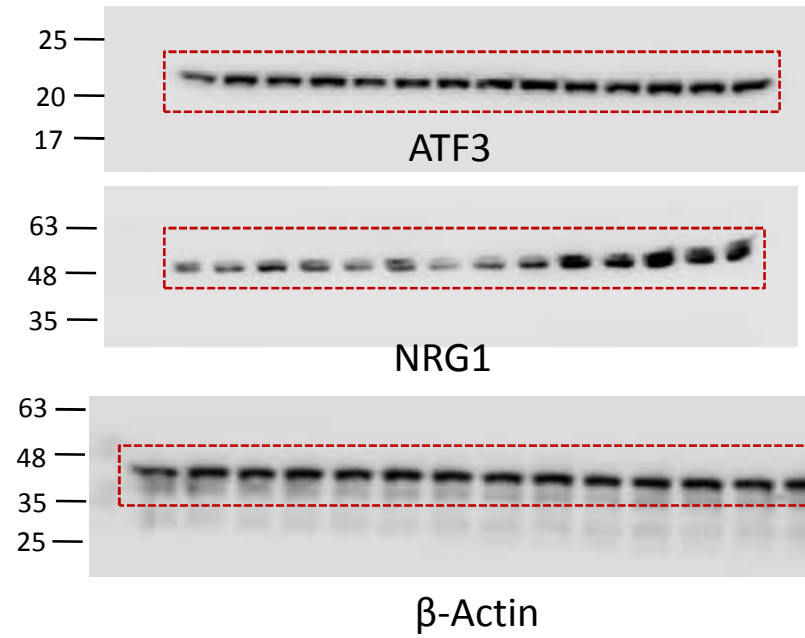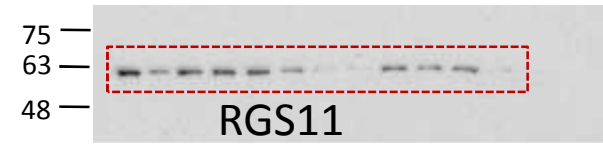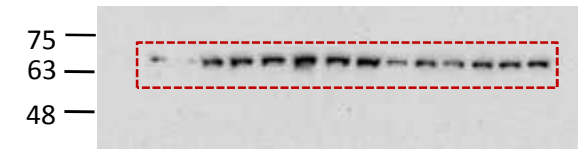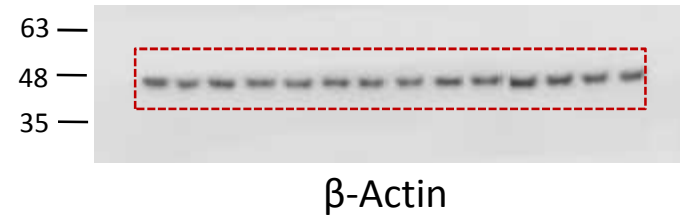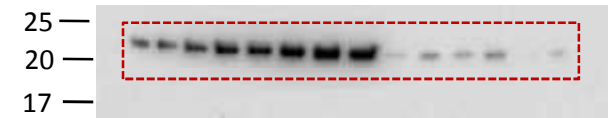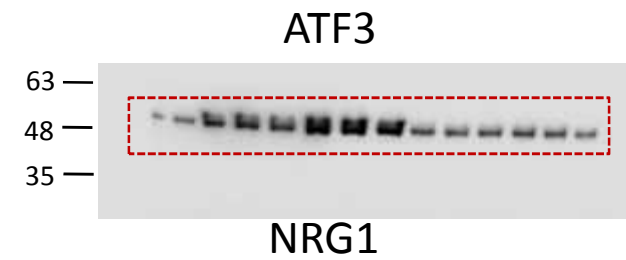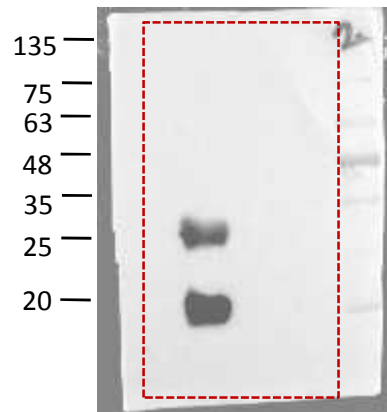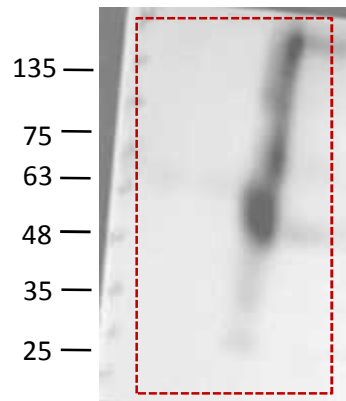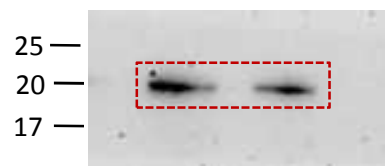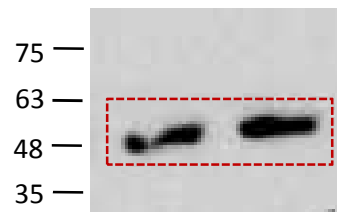

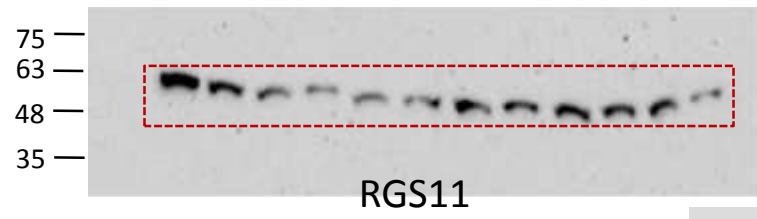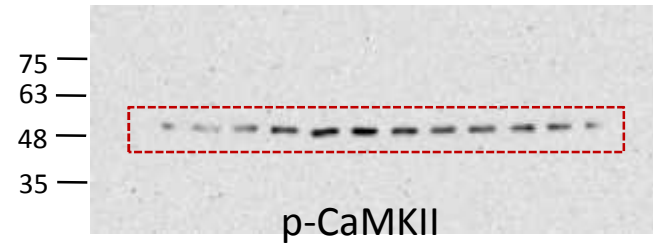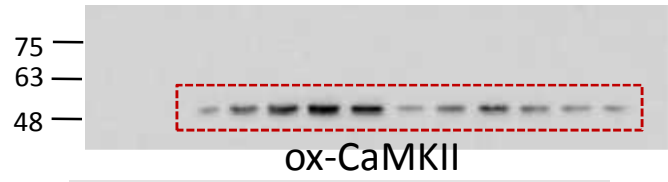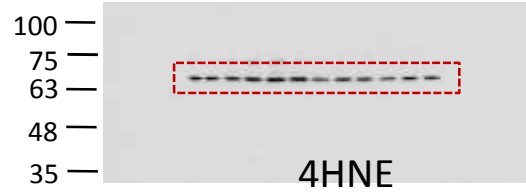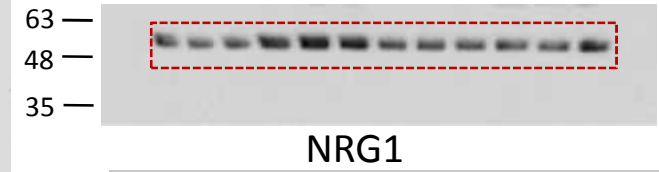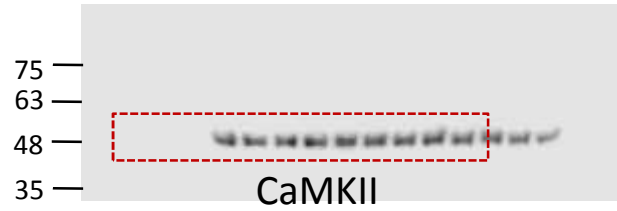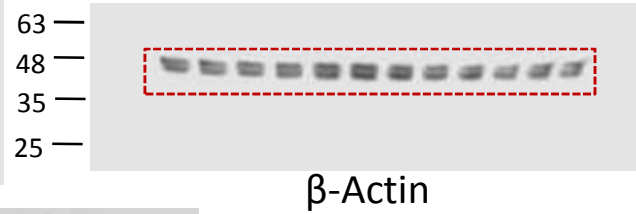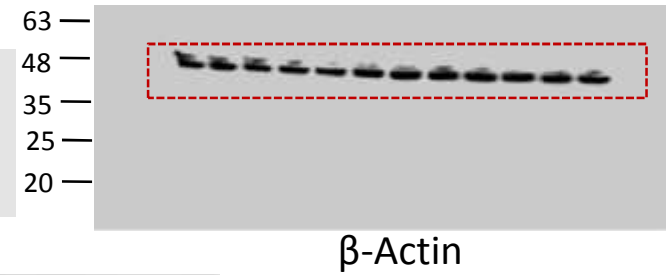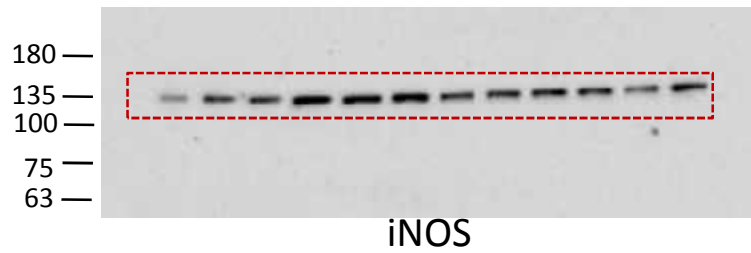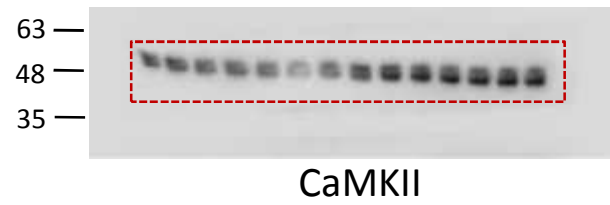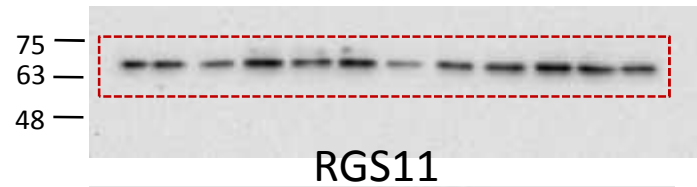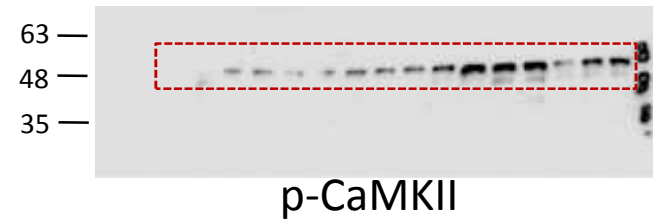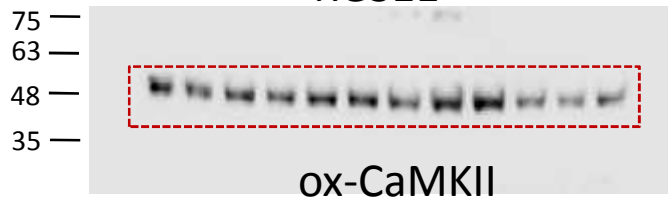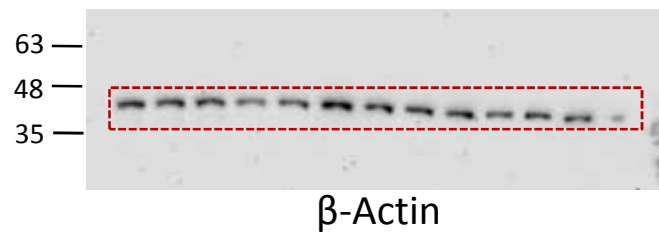

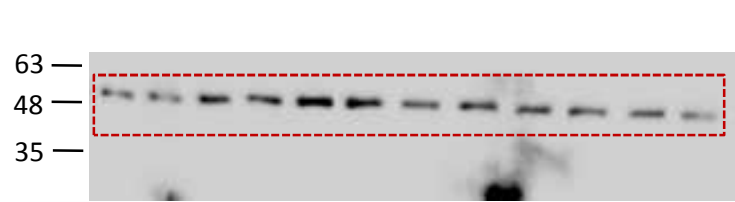

NRG1

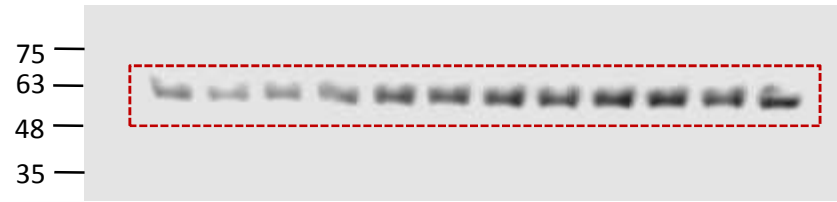

RGS11

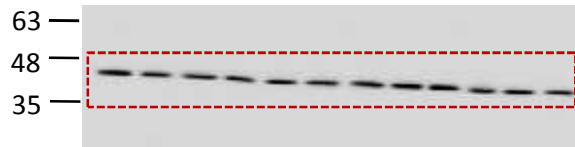

$\beta$ -Actin

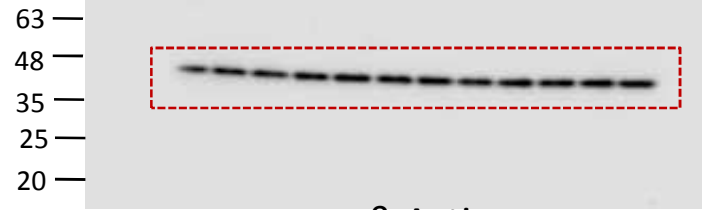

$\beta$ -Actin

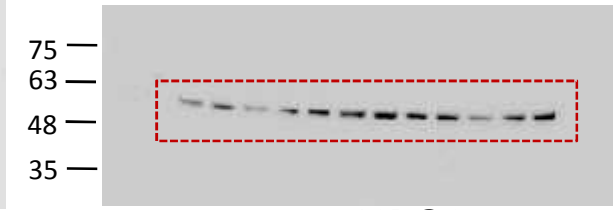

NRG1

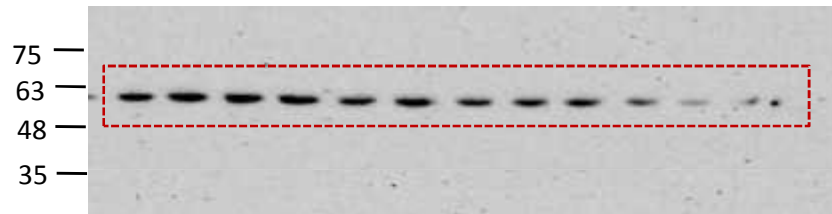

RGS11

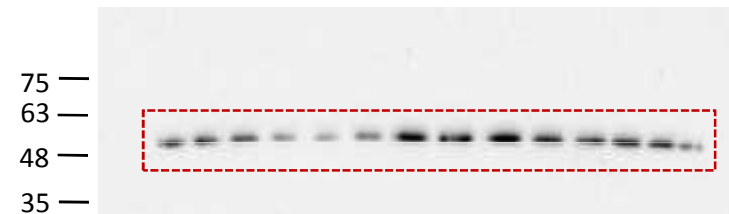

p-CAMKII

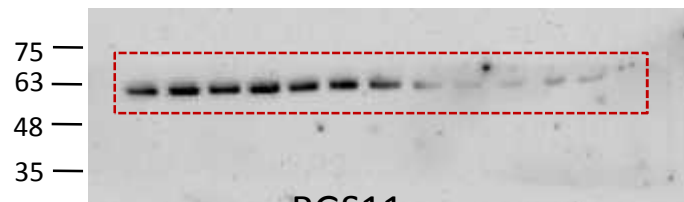

RGS11

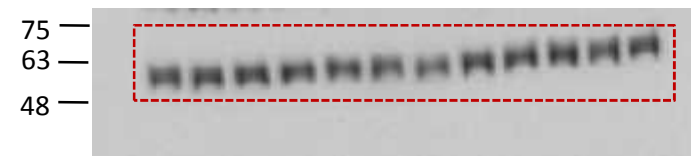

CaMKII

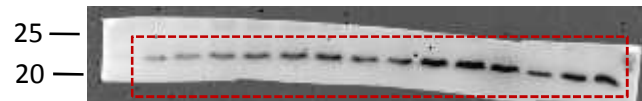

ATF3

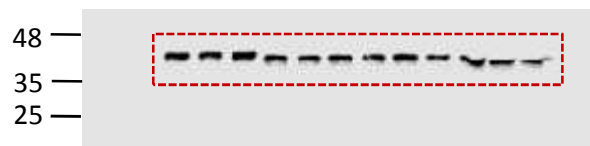

$\beta$ -Actin

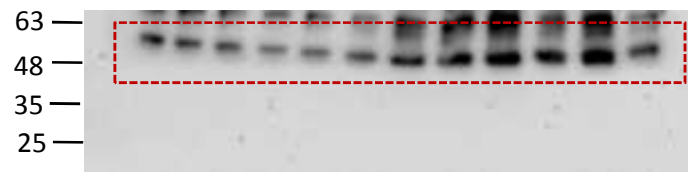

ox-CaMKII

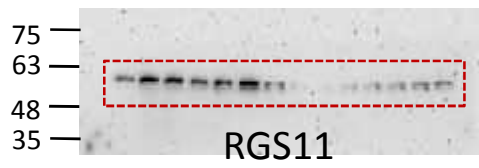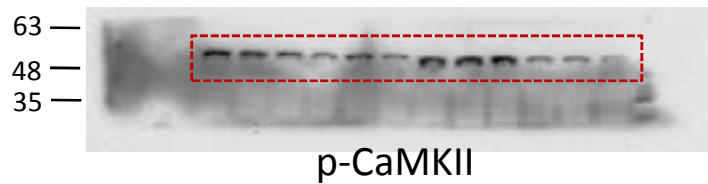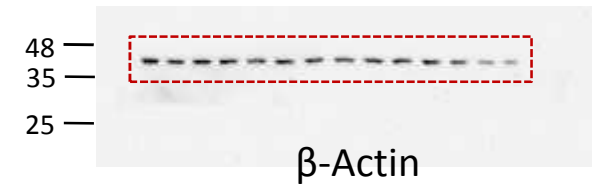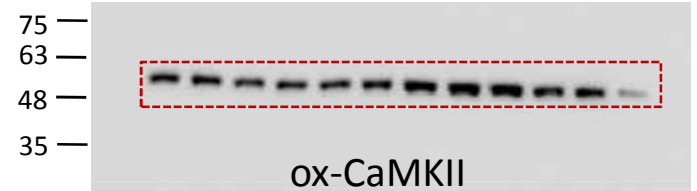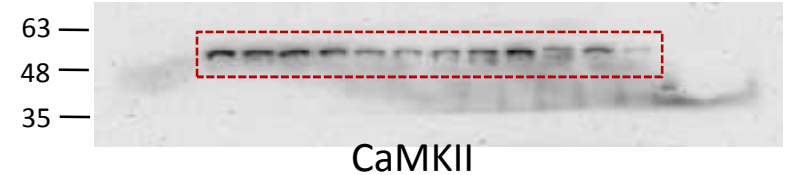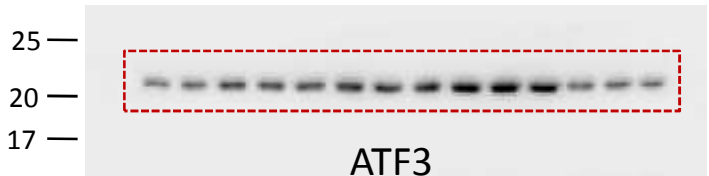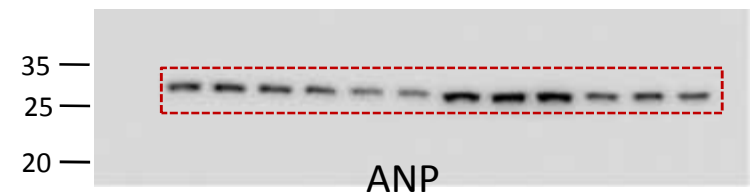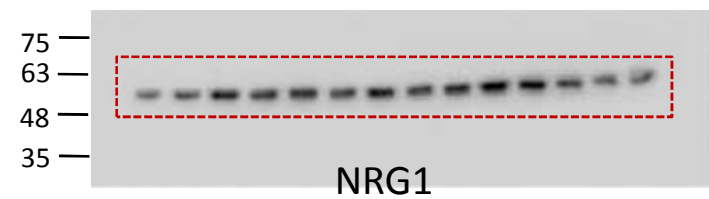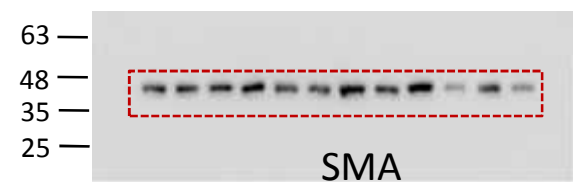

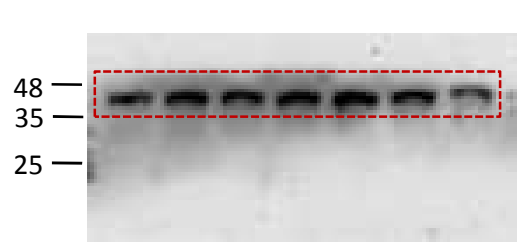

CRISPR\_β-Actin

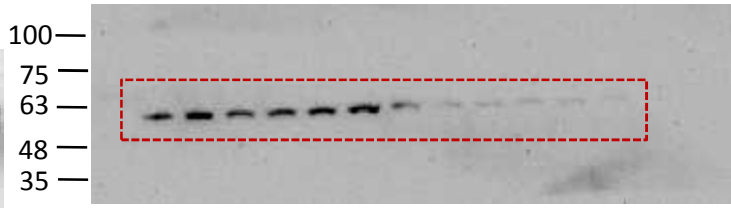

RGS11

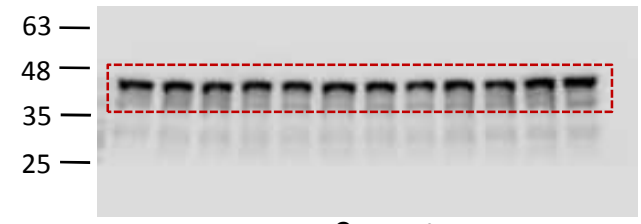

β-Actin

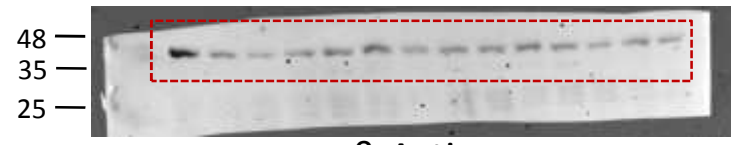

β-Actin

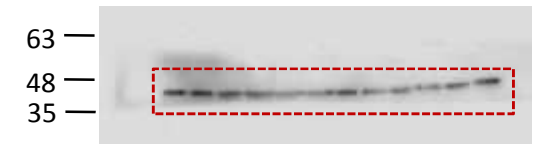

β-Actin

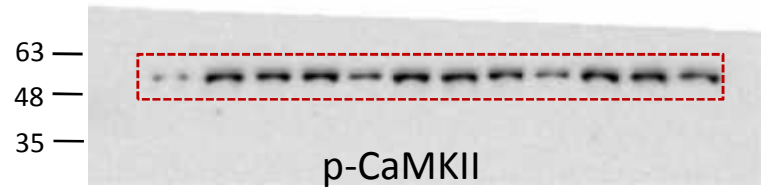

p-CaMKII

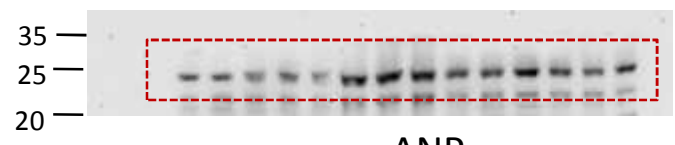

ANP

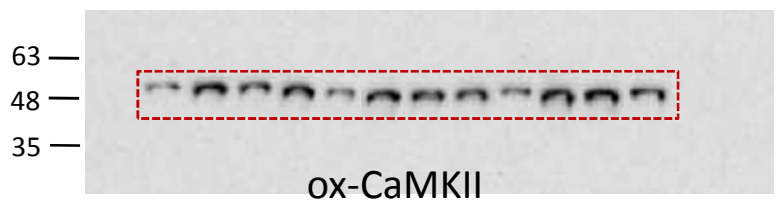

ox-CaMKII

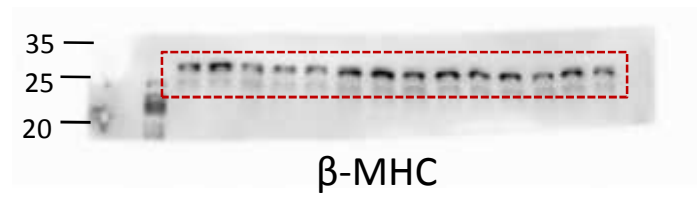

β-MHC

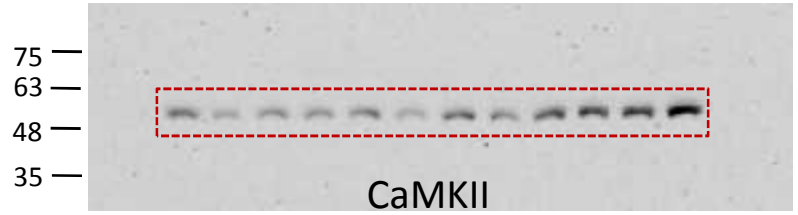

CaMKII

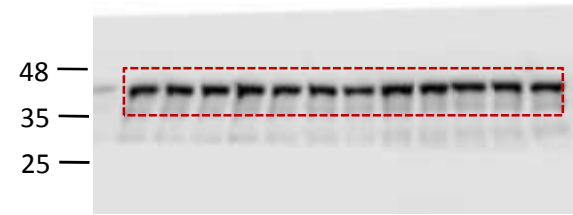

β-Actin

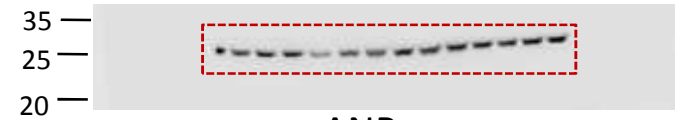

ANP

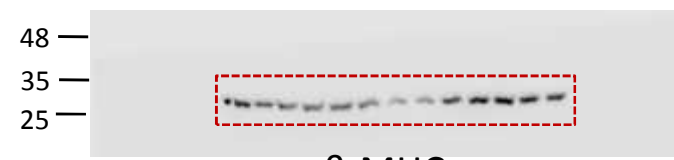

β-MHC

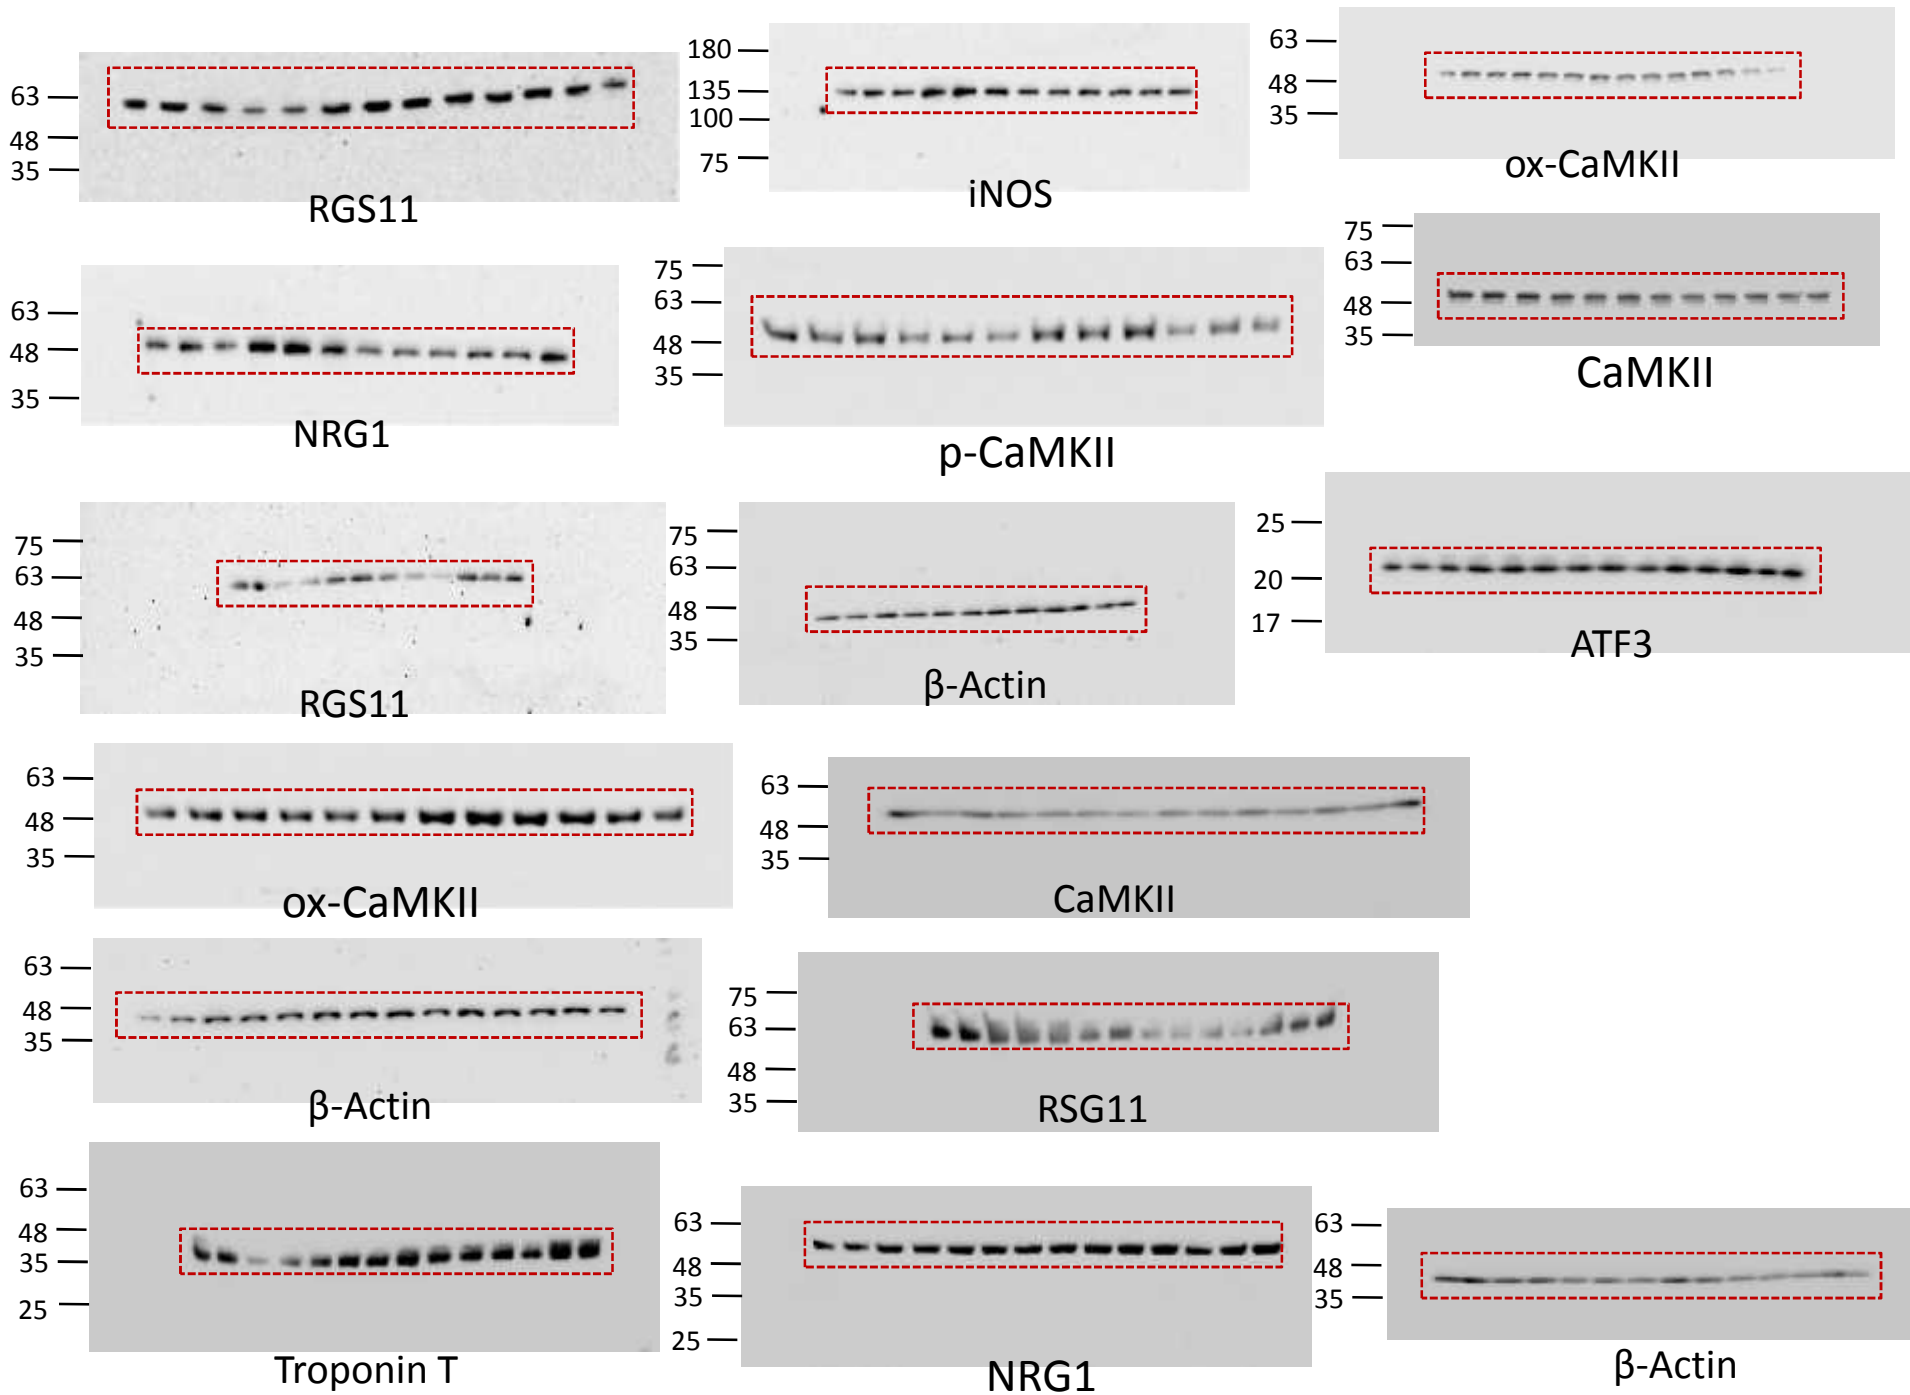



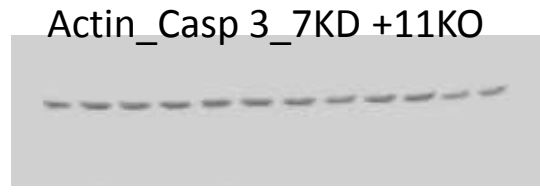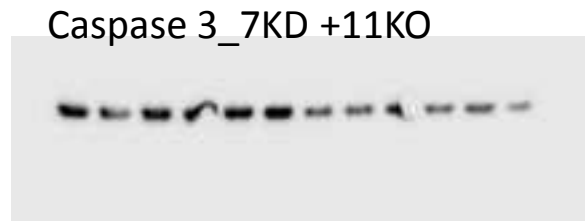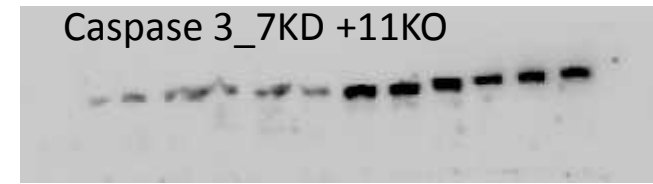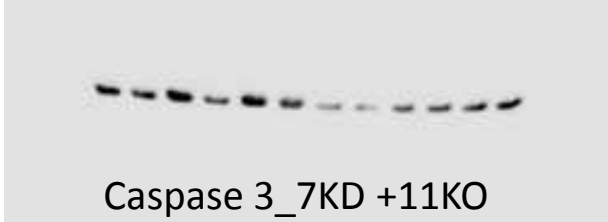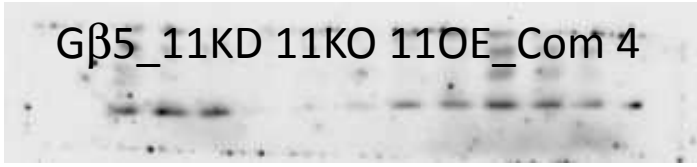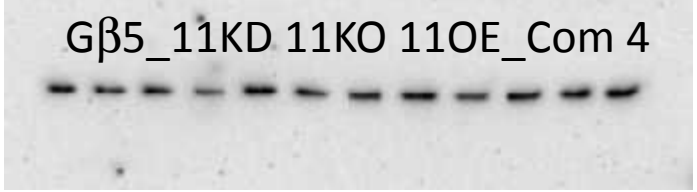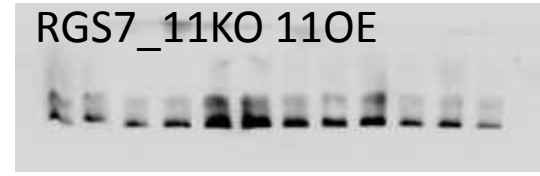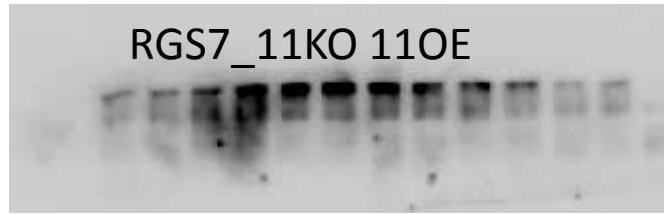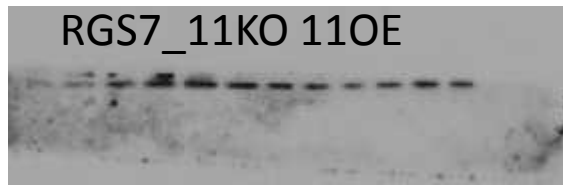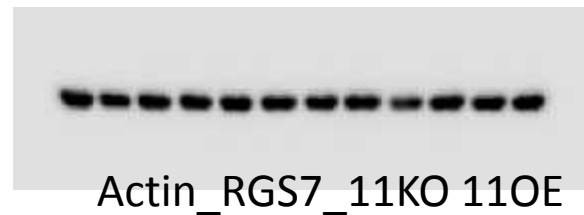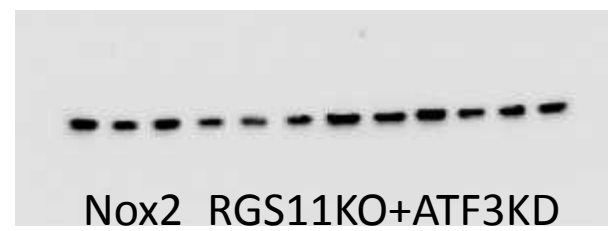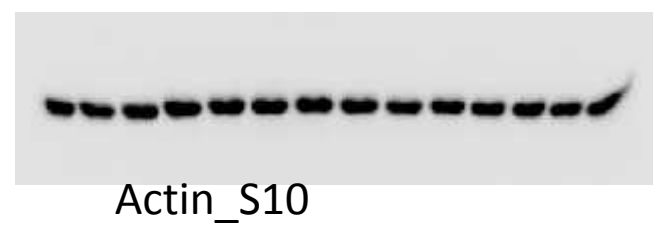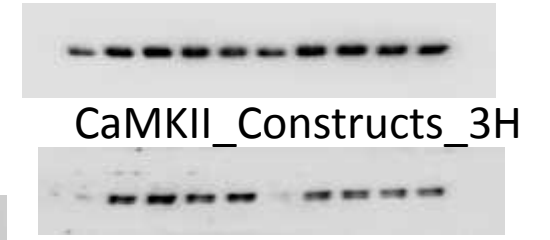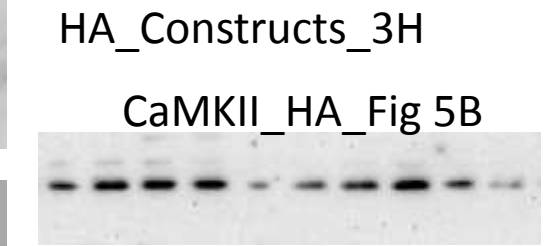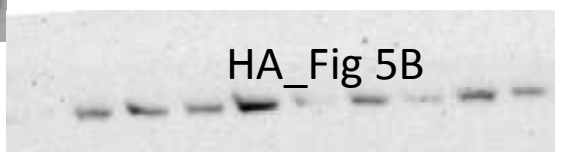

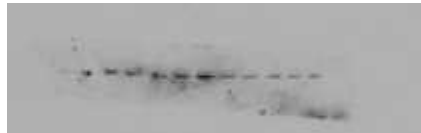

RGS11\_Diff Weeks\_Mouse\_Dox

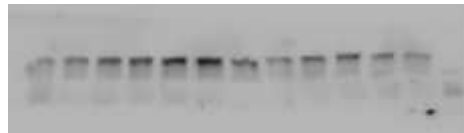

RGS11\_Diff Weeks\_Mouse\_Dox

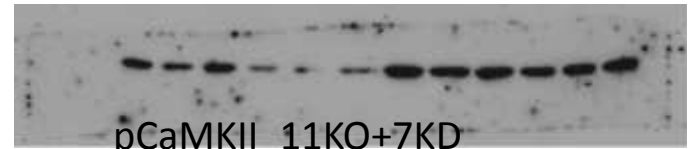

pCaMKII\_11KO+7KD

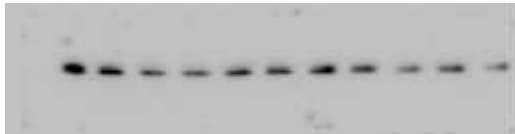

RGS11\_Diff Weeks\_Mouse\_Dox

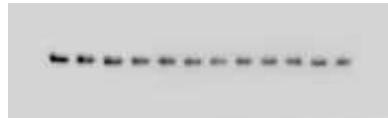

RGS11\_Diff Weeks\_Mouse\_Dox

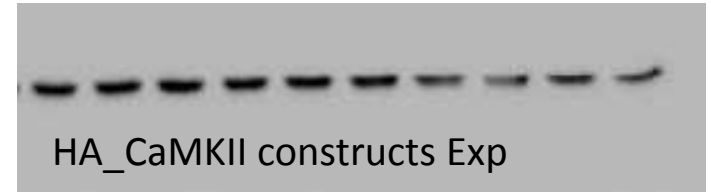

HA\_CaMKII constructs Exp

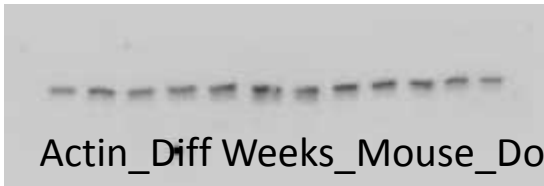

Actin\_Diff Weeks\_Mouse\_Dox

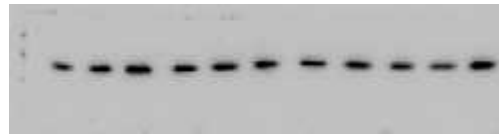

Actin\_Diff Weeks\_Mouse\_Dox

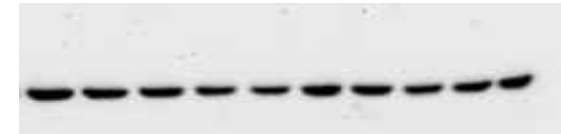

CaMKII\_CaMKII constructs Exp

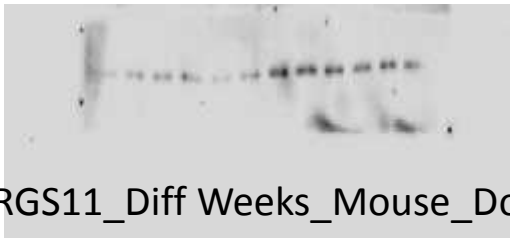

RGS11\_Diff Weeks\_Mouse\_Dox

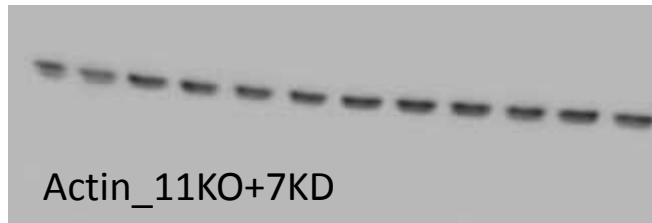

Actin\_11KO+7KD

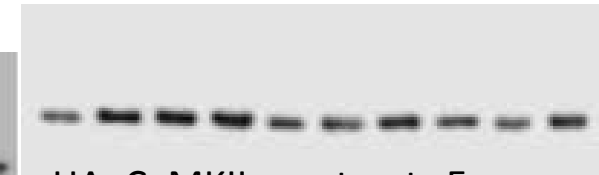

HA\_CaMKII constructs Exp

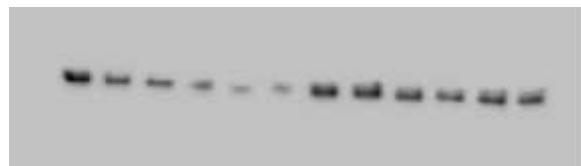

pCaMKII\_11KO+7KD

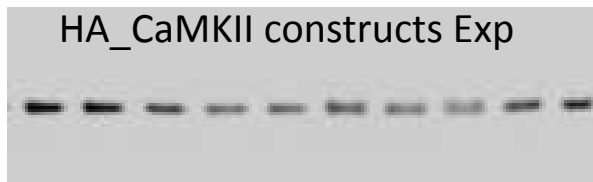

HA\_CaMKII constructs Exp

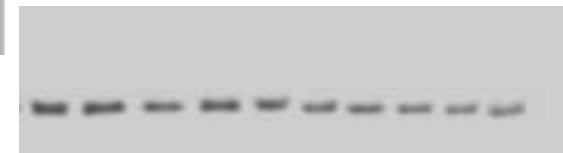

HA\_CaMKII constructs Exp

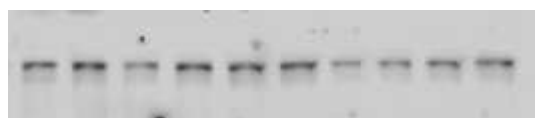

HA\_CaMKII constructs Exp\_5B

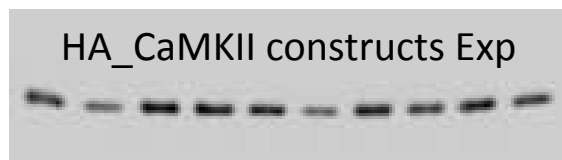

HA\_CaMKII constructs Exp

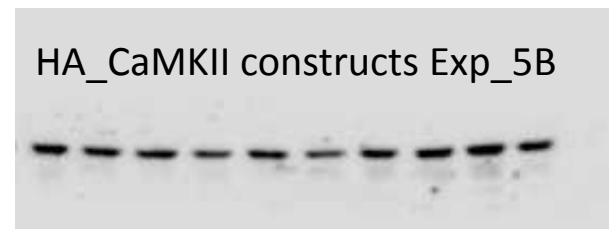

HA\_CaMKII constructs Exp\_5B

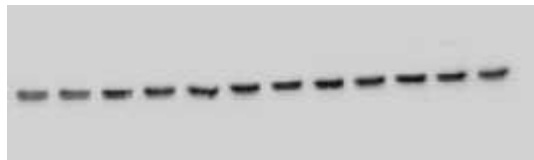

Actin\_Comment 6\_Dox+NAC

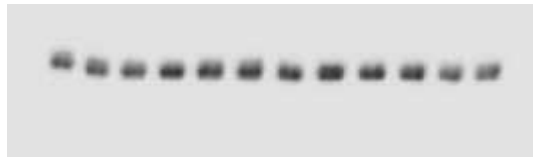

Actin\_RGS11 KO-Fig 4E

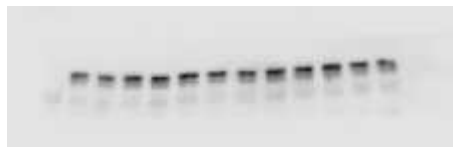

Actin\_Comment 10\_Adele\_3H

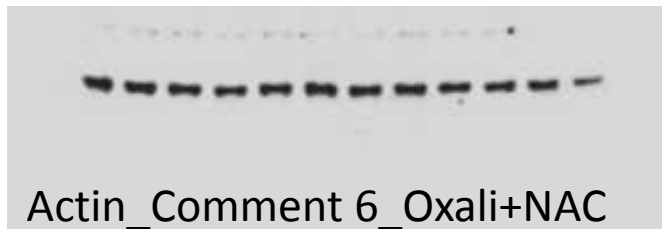

Actin\_Comment 6\_Oxali+NAC

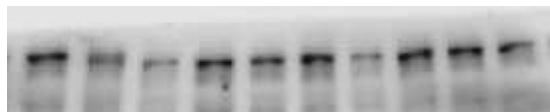

HA\_CaMKII constructs Exp\_5B

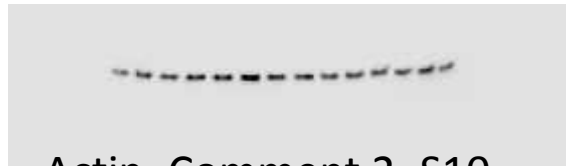

Actin\_Comment 2\_S10

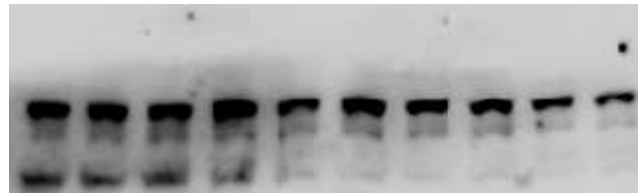

HA\_Comment 10\_5B

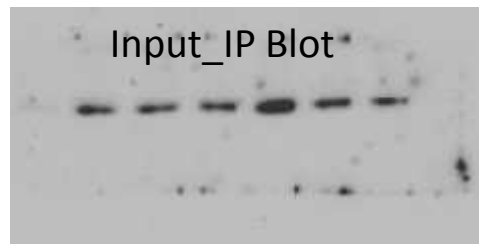

Input\_IP Blot

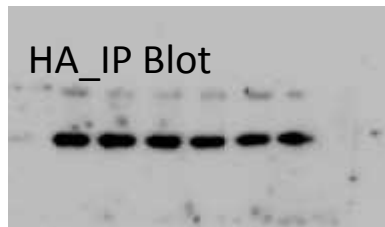

HA\_IP Blot

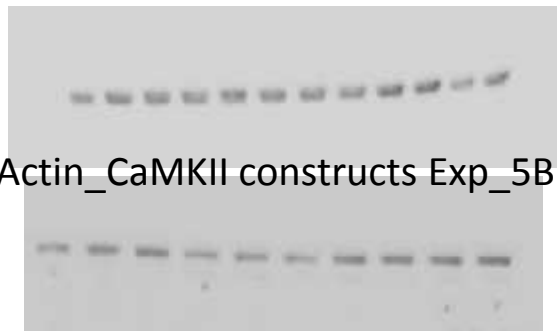

Actin\_Comment 6\_Oxali+NAC

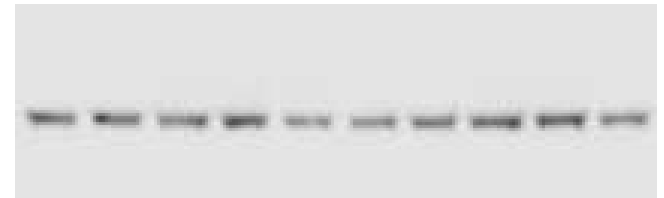

CaMKII\_Comment 10\_5B

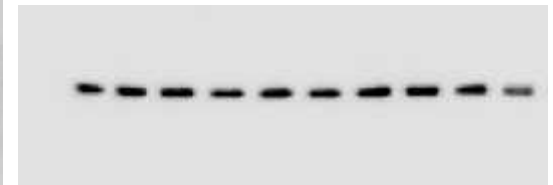

Actin\_Comment 10\_5B

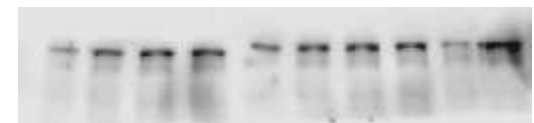

HA\_CaMKII constructs Exp\_5B

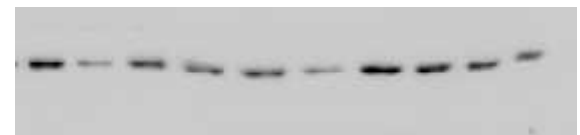

HA\_CaMKII constructs Exp\_5B

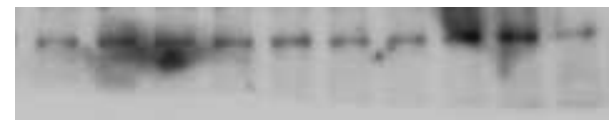

HA\_CaMKII constructs Exp\_5B

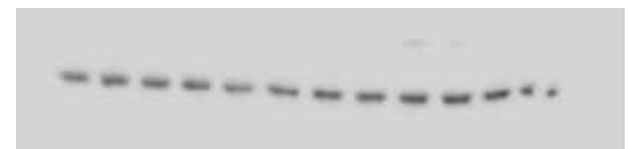

CaMKII\_11KO 7KD

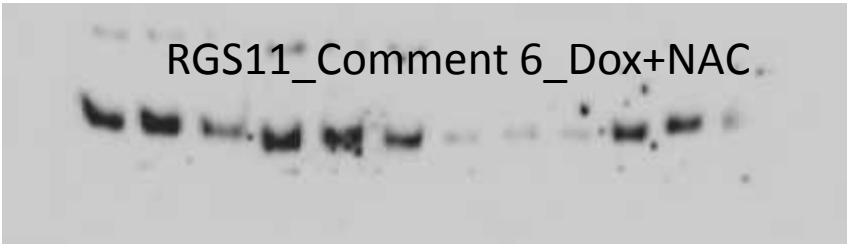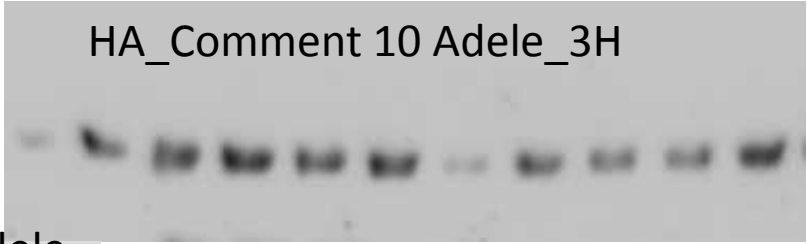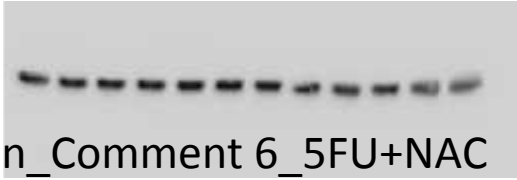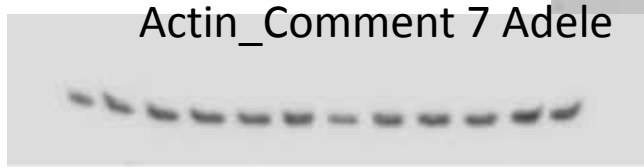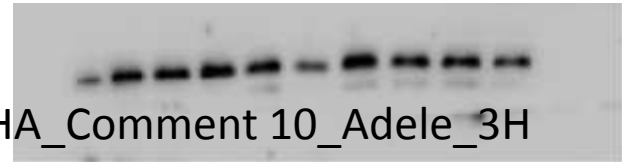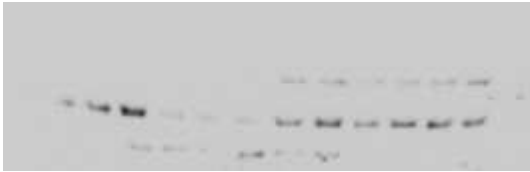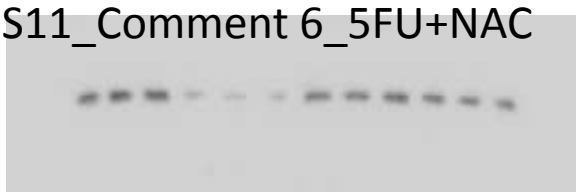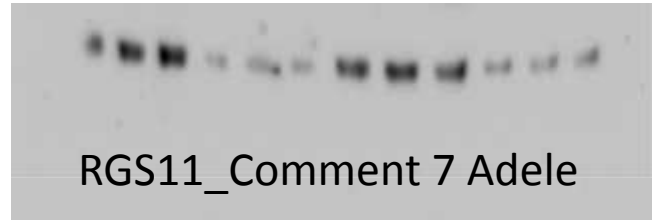

RGS11\_Comment 6\_5FU+NAC

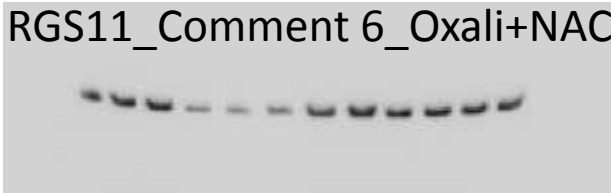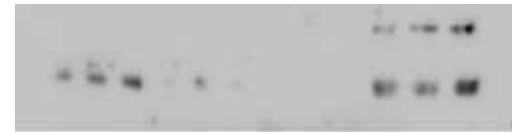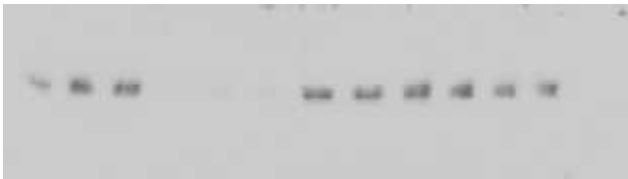

RGS11\_Comment 6\_Oxali+NAC

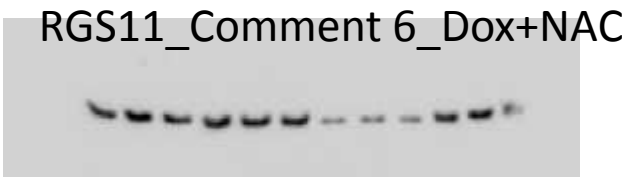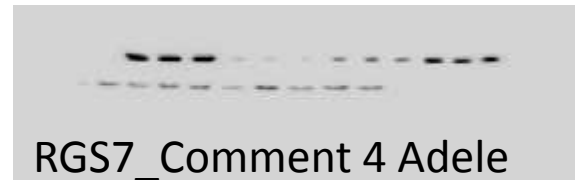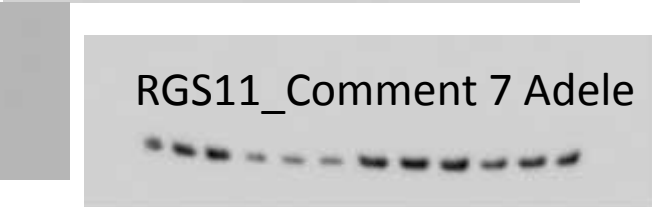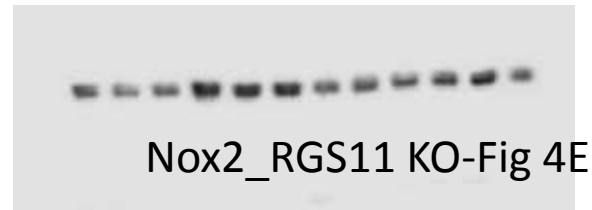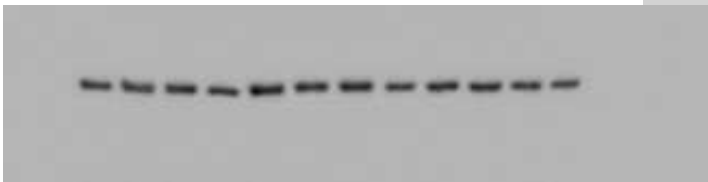

Actin\_Comment 4 Adele
